# Supplementary material
Source: bioRxiv or medRxiv preprint supplement (https://www.biorxiv.org/highwire/filestream/125689/field_highwire_adjunct_files/9/416701-9.pdf)
Supplement: Supplementary file [file 416701-9.pdf]

| <b>Coefficient</b>  | <b>Value</b>                                    | <b>Reference</b>                                 |
|---------------------|-------------------------------------------------|--------------------------------------------------|
| $D_{W\_O}$          | $3.01 \cdot 10^{-9} \text{ m}^2 \text{ s}^{-1}$ | (1)                                              |
| $D_{W\_N}$          | $1.62 \cdot 10^{-9} \text{ m}^2 \text{ s}^{-1}$ | (1)                                              |
| $D_{W\_A}$          | $1.74 \cdot 10^{-9} \text{ m}^2 \text{ s}^{-1}$ | (1)                                              |
| $D_{W\_C}$          | $1.24 \cdot 10^{-9} \text{ m}^2 \text{ s}^{-1}$ | (2)                                              |
| $f_{VS}$            | 0.2-0.8                                         | Different scenarios tested                       |
| $fX_H$              | 76.8% and 54.8%                                 | Calculated ( $1-fX_A-fX_N-fX_{\text{anammox}}$ ) |
| $fX_A$              | 7.4% and 22.6%                                  | For Z400 and Z50                                 |
| $fX_N$              | 12.9% and 22.6%                                 | For Z400 and Z50                                 |
| $S_{O,\text{bulk}}$ | 5.5 and 5.6 $\text{g m}^{-3}$                   | For Z400 and Z50 in batch tests                  |
| $S_{N,\text{bulk}}$ | 0.5 and 0.8 $\text{g m}^{-3}$                   | For Z400 and Z50 in batch tests                  |
| $S_{A,\text{bulk}}$ | 30.7 and 31.3 $\text{g m}^{-3}$                 | For Z400 and Z50 in batch tests                  |
| $S_{C,\text{bulk}}$ | 10 $\text{g m}^{-3}$                            | Assumed                                          |
| $L$                 | 379 and 45 $\mu\text{m}$                        | For Z400 and Z50 (based on FISH)                 |
| $\delta_{BL}$       | $(1.6-16.3) \cdot 10^{-6} \text{ m}$            | Fitted values                                    |

## References

1. Williamson K, McCarty PL. 1976. Verification Studies of the Biofilm Model for Bacterial Substrate Utilization. Journal (Water Pollution Control Federation) 48:281-296.
2. Perry R, Perry J. 1963. Chemical Engineers' Handbook, 4 ed. McGraw-Hill, New York.
